# Supplementary material for: A natural variant of the essential host gene MMS21 restricts the parasitic 2-micron plasmid in Saccharomyces cerevisiae
Source: eLife journal article supplement (doi:10.7554/elife.62337), 2020-10-16

Y9 haploid

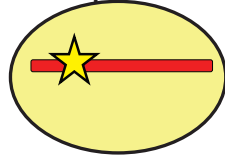

BY4742 haploid

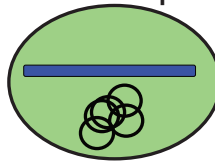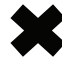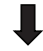

○ GFP-2 $\mu$  plasmid

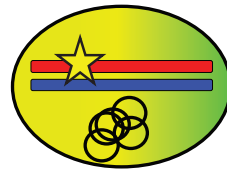

Y9/ BY4742  
diploid

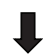

Meiosis

Non-permissive  
pool

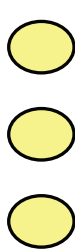

Permissive  
pool

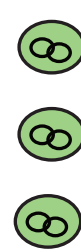

Y9 allele  
frequency

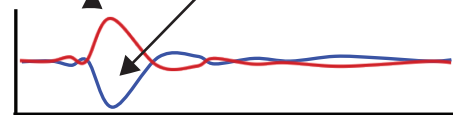

Genome position

LOD  
scores

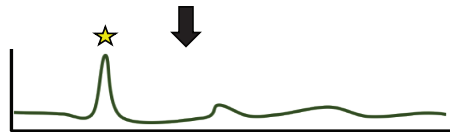

Supplement: supp [file elife-62337-supp-v1.zip]
