# Supplementary material for: A natural variant of the essential host gene MMS21 restricts the parasitic 2-micron plasmid in Saccharomyces cerevisiae
Source: eLife journal article supplement (doi:10.7554/elife.62337), 2020-10-16
Supplement: supp [file elife-62337-supp-v1.zip]

Archive with 16 entries (16 files):
- elife_poa_e62337_Supplementary_file_1.xlsx
- elife_poa_e62337_Supplementary_file_2.xlsx
- elife_poa_e62337_Supplementary_file_3.xlsx
- elife_poa_e62337_Supplementary_file_4.xlsx
- elife_poa_e62337_Figure_1_figure_supplement_1.pdf
- elife_poa_e62337_Figure_2_figure_supplement_1.pdf
- elife_poa_e62337_Figure_2_figure_supplement_2.pdf
- elife_poa_e62337_Figure_3_figure_supplement_1.pdf
- elife_poa_e62337_Figure_4_figure_supplement_1.pdf
- elife_poa_e62337_Figure_4_figure_supplement_2.pdf
- elife_poa_e62337_Figure_4_figure_supplement_3.pdf
- elife_poa_e62337_Figure_4_figure_supplement_4.pdf
- elife_poa_e62337_Figure_5_figure_supplement_1.pdf
- elife_poa_e62337_Figure_5_figure_supplement_2.pdf
- elife_poa_e62337_Figure_5_figure_supplement_3.pdf
- elife_poa_e62337_Transparent_Reporting_File.docx
