# Supplementary material for: A natural variant of the essential host gene MMS21 restricts the parasitic 2-micron plasmid in Saccharomyces cerevisiae
Source: eLife journal article supplement (doi:10.7554/elife.62337), 2020-10-16
Supplement: supp [file elife-62337-supp-v1.zip › elife_poa_e62337_Supplementary_file_4.xlsx]

## Sheet: BYragi_SNPs
TABLE S4: Missense polymorphisms in Smc5/6 complex members and other SUMO ligases.
gene	other gene names	chr	gene left end	gene right end	strand	ORF length	protein length	SNP position (genome)	SNP position (CDS)	SNP position (protein)	reference genome allele	other allele(s)	is multiallelic	Allele	Amino acids	Codons	BY4742 allele	Y9 allele	Y12 allele
SMC5	YOL034W, DNA repair ATPase SMC5	chrXV	259923	263204	+	3282	1094	260340	418	140	A	G		G	I/V	Att/Gtt	A	G	G
SMC5								260613	691	231	T	G		G	F/V	Ttt/Gtt	T	G	G
SMC5								261556	1634	545	C	A		A	T/N	aCc/aAc	C	A	A
SMC5								261583	1661	554	G	A		A	R/K	aGg/aAg	G	A	A
SMC6	YLR383W, DNA repair protein SMC6,RHC18	chrXII	885288	888632	+	3345	1115	885303	16	6	A	G		G	I/V	Att/Gtt	A	G	G
SMC6								885745	458	153	T	C		C	I/T	aTc/aCc	T	C	C
SMC6								886084	797	266	C	T		T	A/V	gCa/gTa	C	T	T
SMC6								886881	1594	532	G	C		C	A/P	Gca/Cca	G	C	C
SMC6								887067	1780	594	T	C		C	C/R	Tgc/Cgc	T	C	C
SMC6								887437	2150	717	A	G		G	D/G	gAc/gGc	A	G	G
NSE1	YLR007W	chrXII	164392	165402	+	1011	337	164732	341	114	A	C		C	H/P	cAc/cCc	A	C	A
NSE1								164734	343	115	A	G		G	N/D	Aat/Gat	A	G	G
NSE1								164865	474	158	G	T,C	y	T	M/I	atG/atT	G	T	C
NSE1								164865	474	158	G	T,C	y	C	M/I	atG/atC	G	T	C
NSE1								164928	537	179	A	C		C	E/D	gaA/gaC	A	C	C
NSE1								164945	554	185	A	G		G	K/R	aAg/aGg	A	G	G
MMS21	YEL019C, NSE2, PSO10, SUMO ligase MMS21	chrV	120498	121301	-	804	268	121096	206	69	G	A		A	T/I	aCc/aTc	G	A	A
NSE3	YDR288W	chrIV	1037195	1038106	+	912	304	1037205	11	4	T	C		C	I/T	aTa/aCa	T	C	C
NSE3								1037262	68	23	A	G		G	K/R	aAa/aGa	A	G	G
NSE3								1037511	317	106	G	A		A	S/N	aGc/aAc	G	A	A
NSE3								1037652	458	153	C	A		A	T/N	aCc/aAc	C	A	A
NSE3								1037990	796	266	C	T		T	L/F	Ctt/Ttt	C	T	T
NSE4	YDL105W,QRI2	chrIV	272389	273597	+	1209	403	No non-synonymous differences between Y9 and BY4742
NSE5	YML023C	chrXIII	226994	228664	-	1671	557	228182	483	161	A	C		C	S/R	agT/agG	A	C	C
NSE5								228183	482	161	C	T		T	S/N	aGt/aAt	C	T	T
NSE5								228217	448	150	C	T		T	G/S	Ggt/Agt	C	T	T
NSE6	YER038C, KRE29	chrV	226858	228252	-	1395	465	227105	1148	383	C	T		T	G/D	gGt/gAt	C	T	T
NSE6								227327	926	309	T	C		C	K/R	aAa/aGa	T	C	C
NSE6								227534	719	240	T	C		C	H/R	cAc/cGc	T	C	C
NSE6								227640	613	205	T	C		C	K/E	Aaa/Gaa	T	C	C
NSE6								228004	249	83	G	T		T	D/E	gaC/gaA	G	T	T
NSE6								228115	138	46	A	C		C	H/Q	caT/caG	A	C	C
SIZ1	YDR409W, SUMO ligase SIZ1,ULL1	chrIV	1289406	1292120	+	2715	905	1289885	480	160	T	A		A	N/K	aaT/aaA	T	A	A
SIZ1								1290868	1463	488	A	G		G	D/G	gAt/gGt	A	G	G
SIZ1								1291009	1604	535	A	G		G	N/S	aAt/aGt	A	G	G
SIZ1								1291228	1823	608	G	A		A	S/N	aGt/aAt	G	A	A
SIZ1								1291654	2249	750	T	C		C	M/T	aTg/aCg	T	C	C
SIZ1								1291869	2464	822	G	C		C	V/L	Gtc/Ctc	G	C	C
SIZ2	YOR156C, NFI1, SUMO ligase NFI1	chrXV	628360	630540	-	2181	727	628428	2113	705	C	T		T	A/T	Gcc/Acc	C	T	T
SIZ2								628572	1969	657	C	A		A	V/L	Gtg/Ttg	C	A	A
SIZ2								629510	1031	344	C	T		T	R/K	aGg/aAg	C	T	T
SIZ2								629803	738	246	C	G		G	K/N	aaG/aaC	C	G	G
