# Supplementary figures and images for: A natural variant of the essential host gene MMS21 restricts the parasitic 2-micron plasmid in Saccharomyces cerevisiae
Source: eLife journal article supplement (doi:10.7554/elife.62337), 2020-10-16

**A**

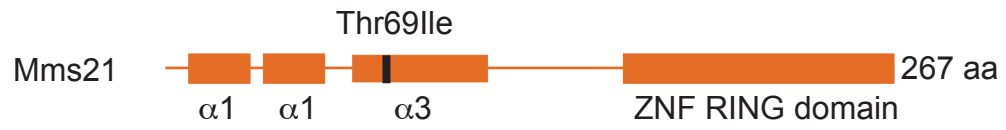

**B**

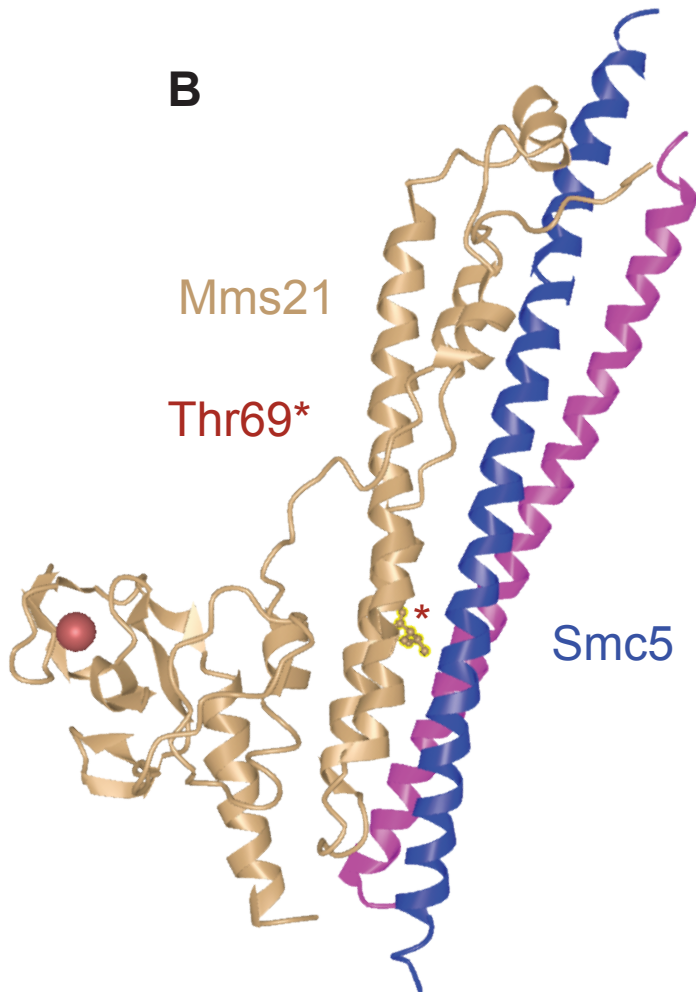

From PDB: 3HTK

**C**

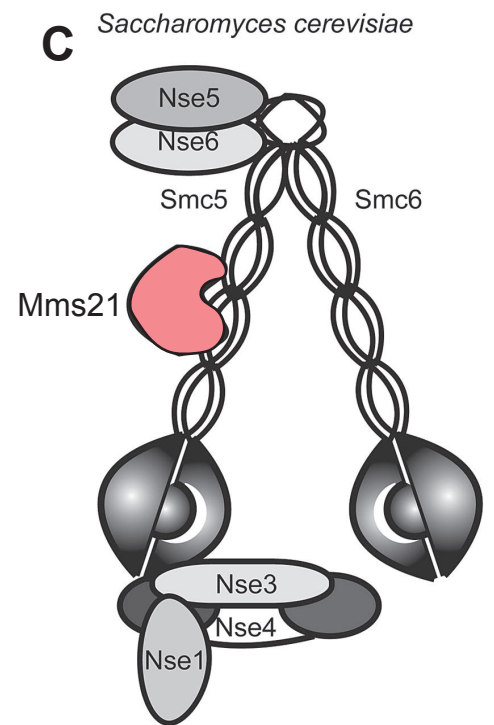

Supplement: supp [file elife-62337-supp-v1.zip]

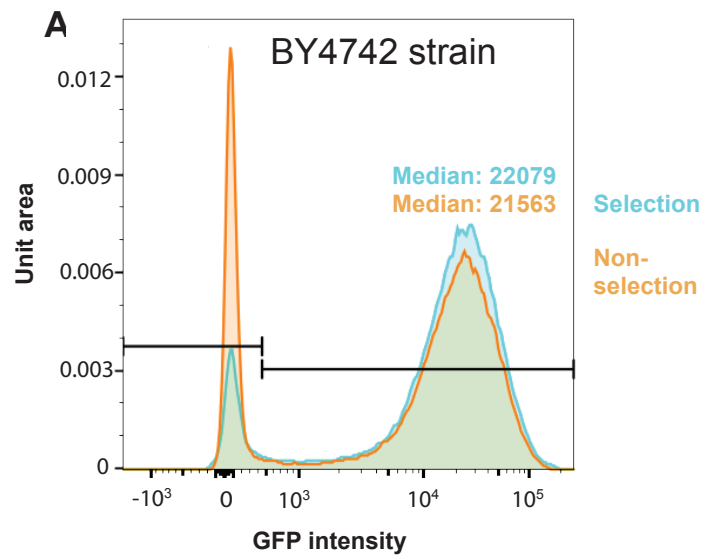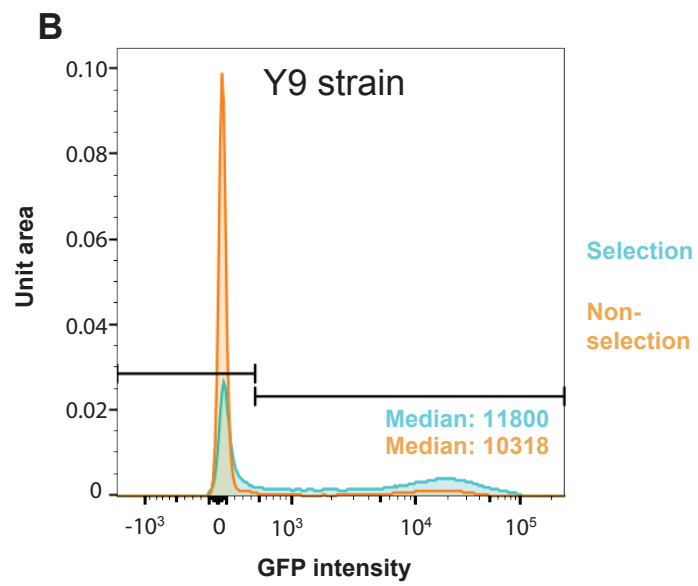

**C**

|        | Selection<br>(Plasmid-<br>negative %) | Non-Selection<br>(Plasmid-<br>negative %) |
|--------|---------------------------------------|-------------------------------------------|
| BY4742 | 9.7                                   | 24                                        |
| Y9     | 48                                    | 83.3                                      |

Supplement: supp [file elife-62337-supp-v1.zip]

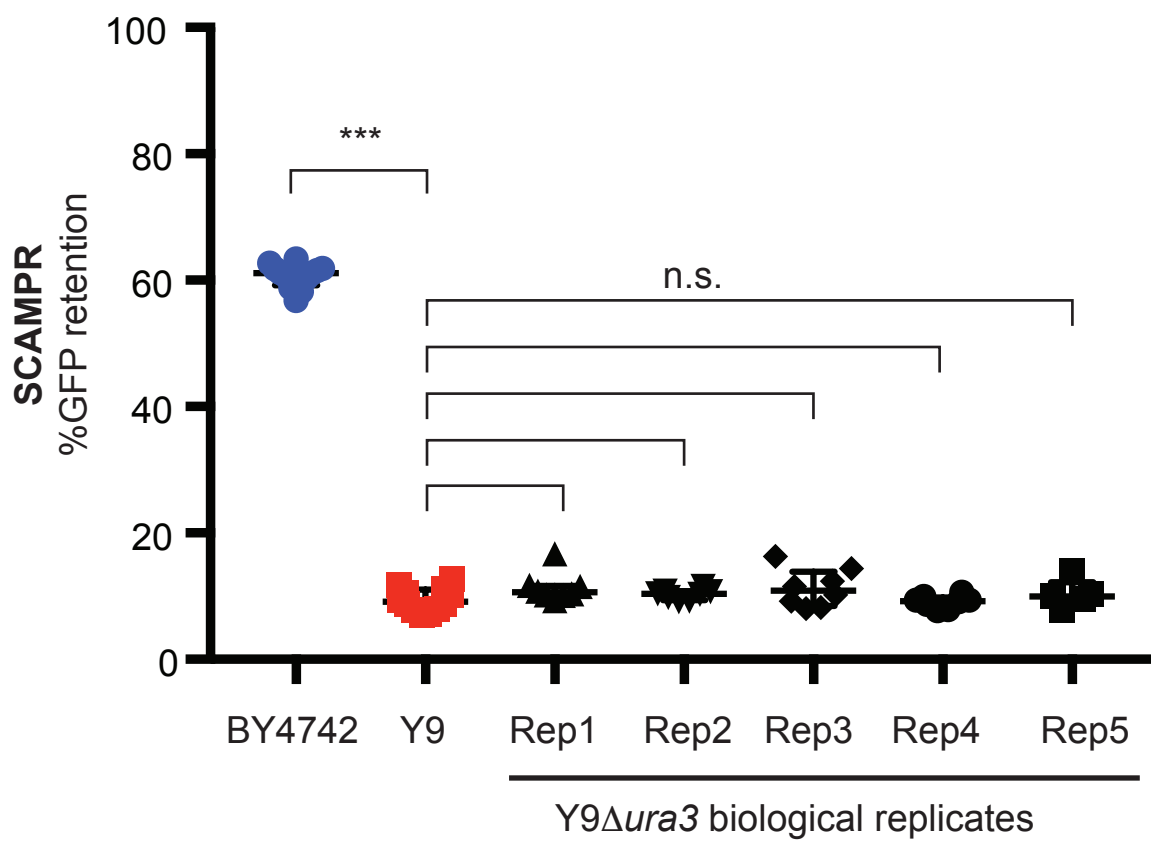

Supplement: supp [file elife-62337-supp-v1.zip]

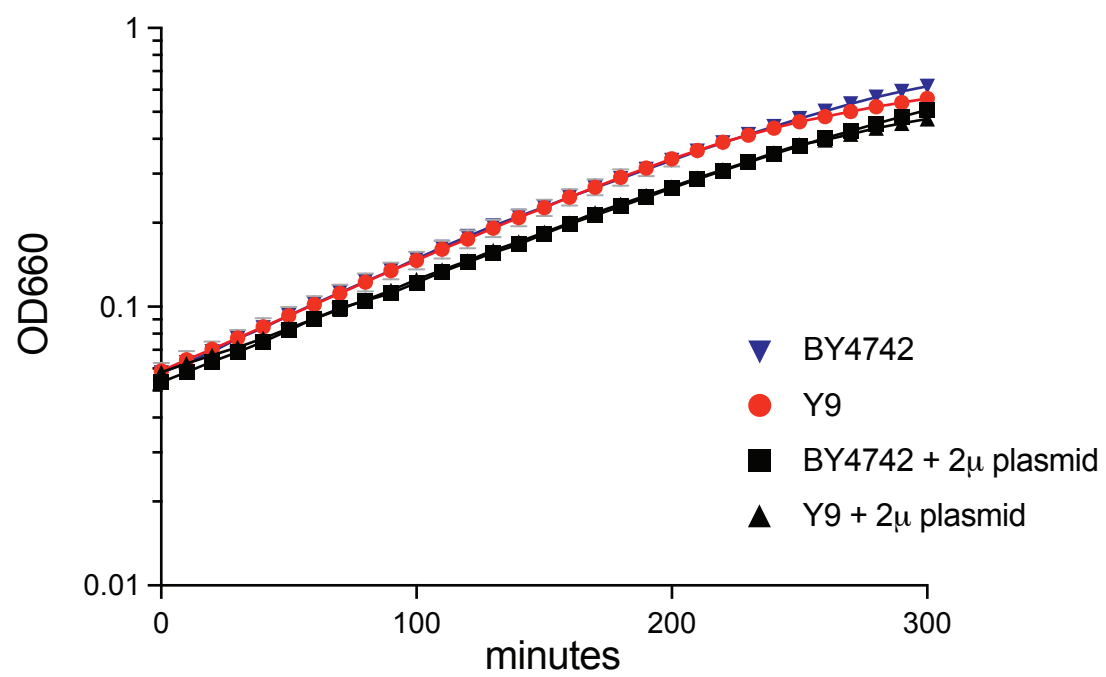

Supplement: supp [file elife-62337-supp-v1.zip]

**A**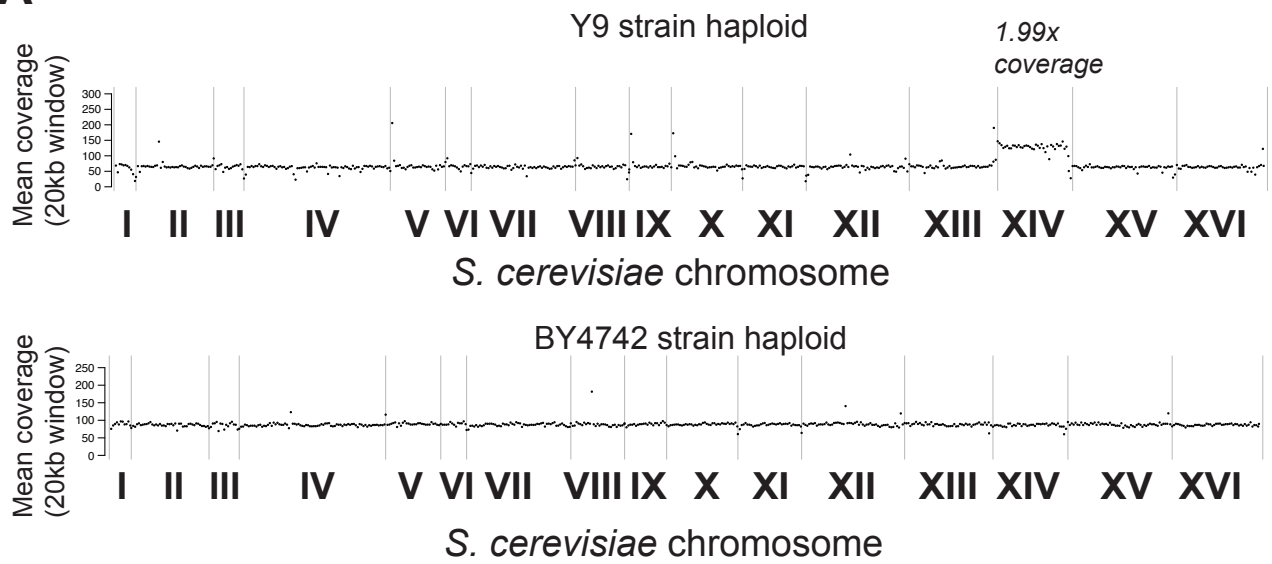**B**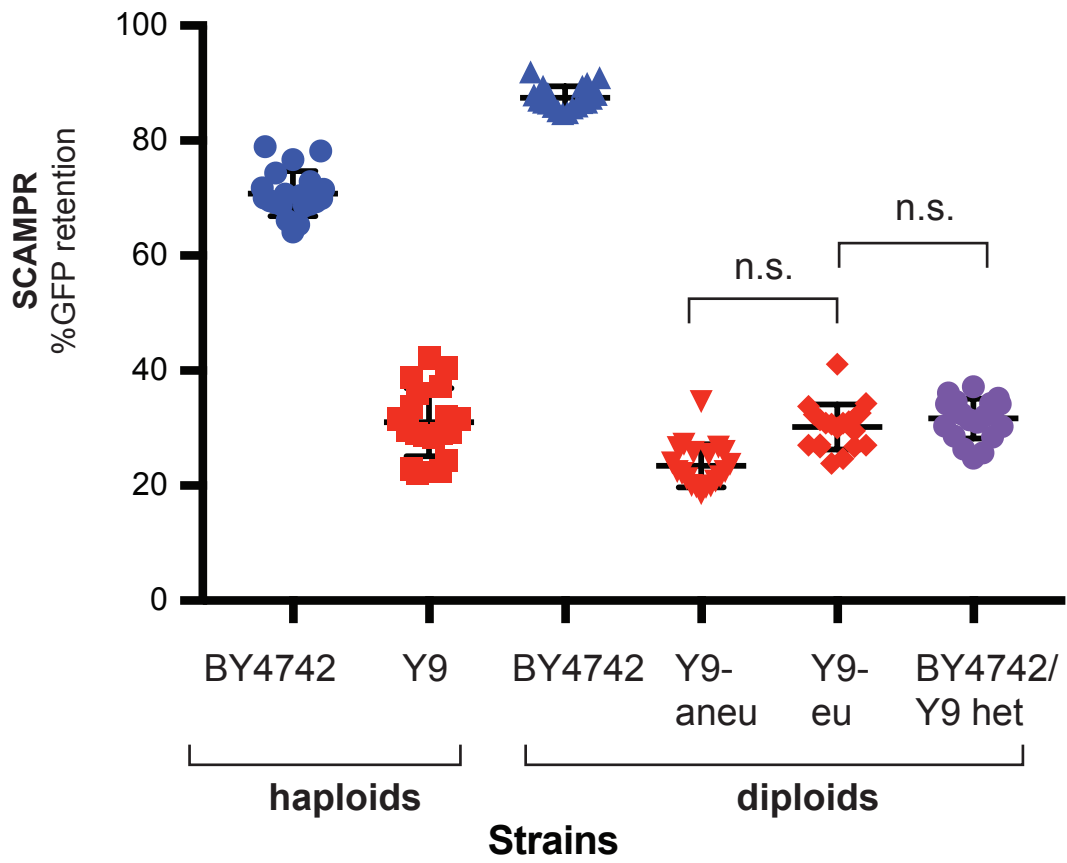

Supplement: supp [file elife-62337-supp-v1.zip]

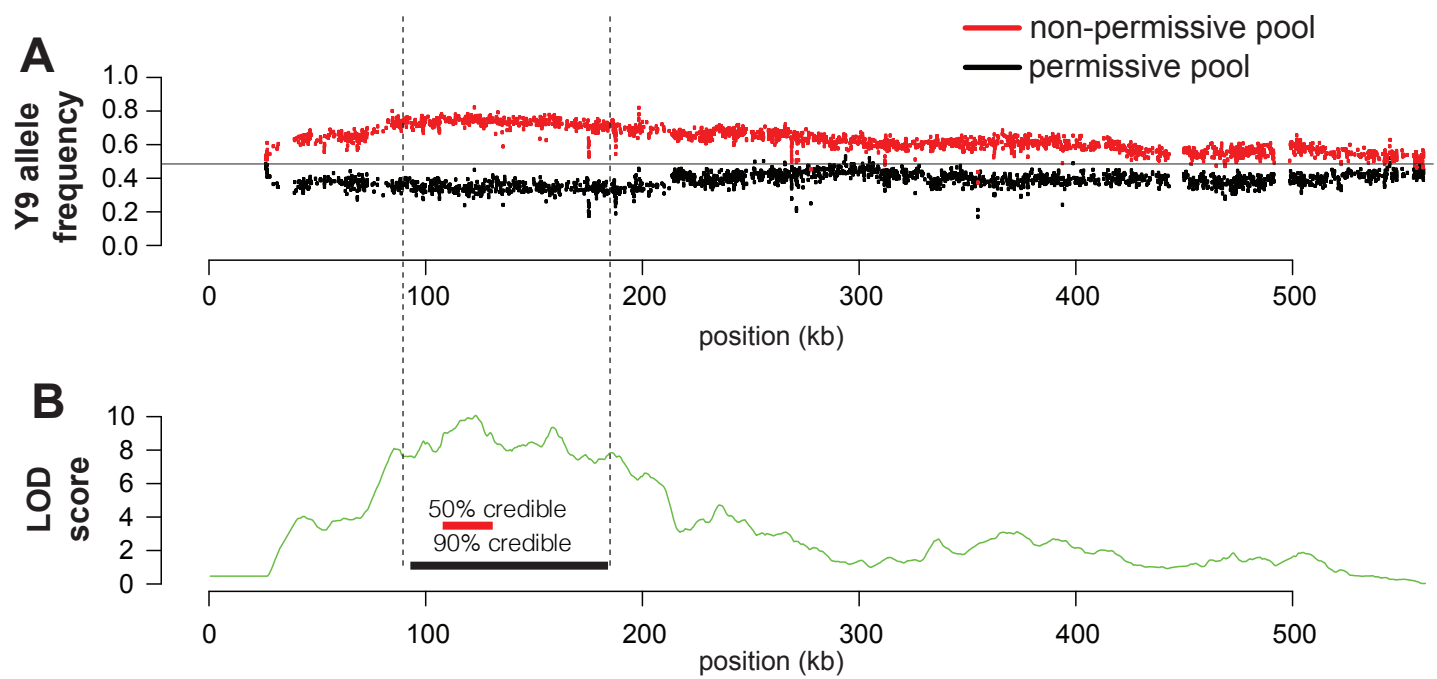

*S. cerevisiae* chromosome V

Supplement: supp [file elife-62337-supp-v1.zip]

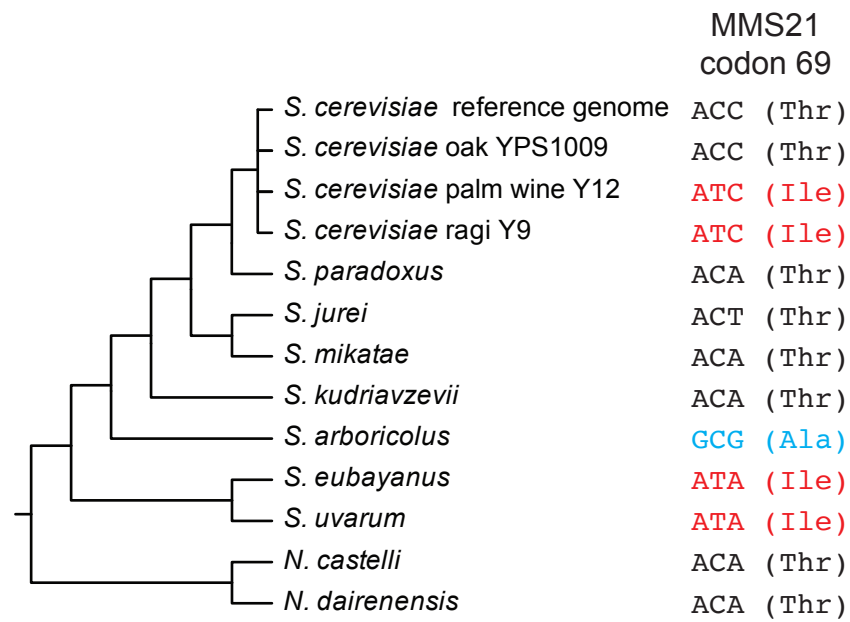

Supplement: supp [file elife-62337-supp-v1.zip]

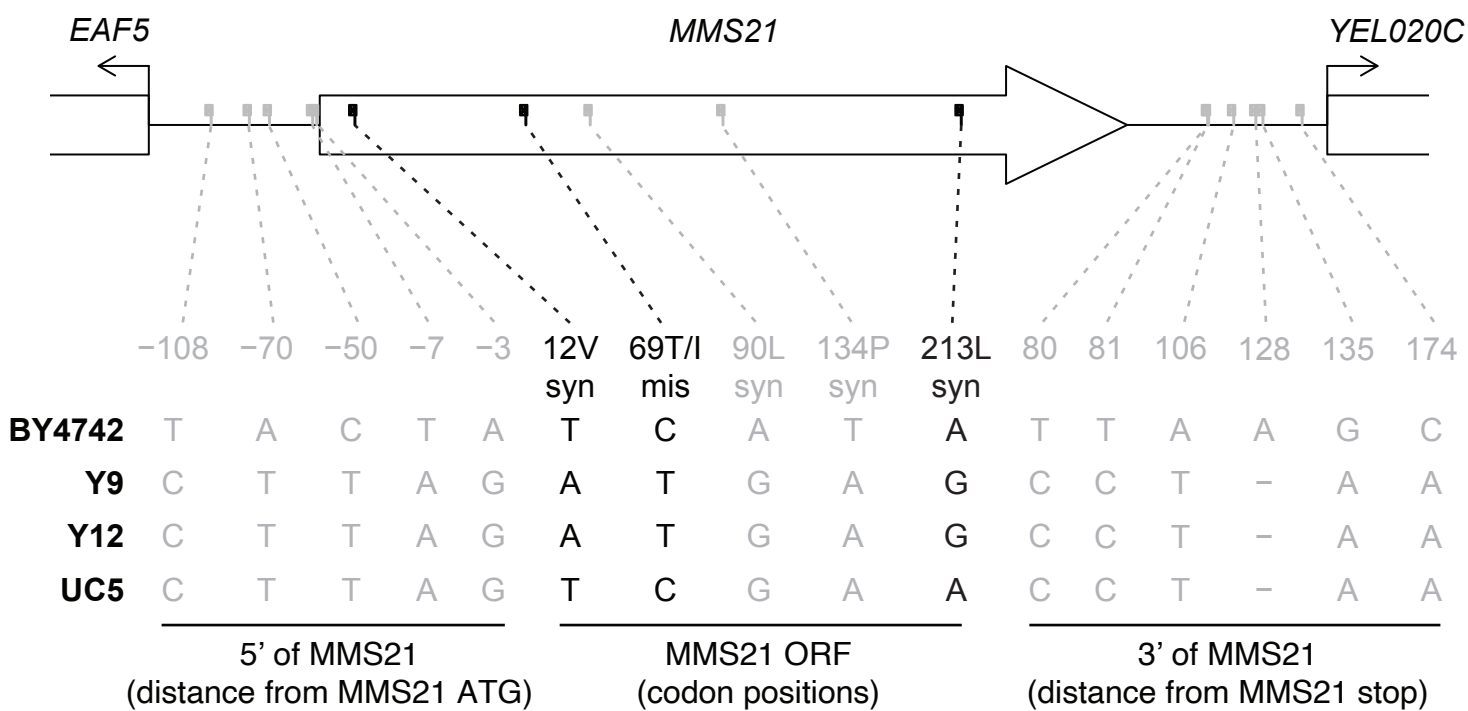

Supplement: supp [file elife-62337-supp-v1.zip]

PCR survey

A

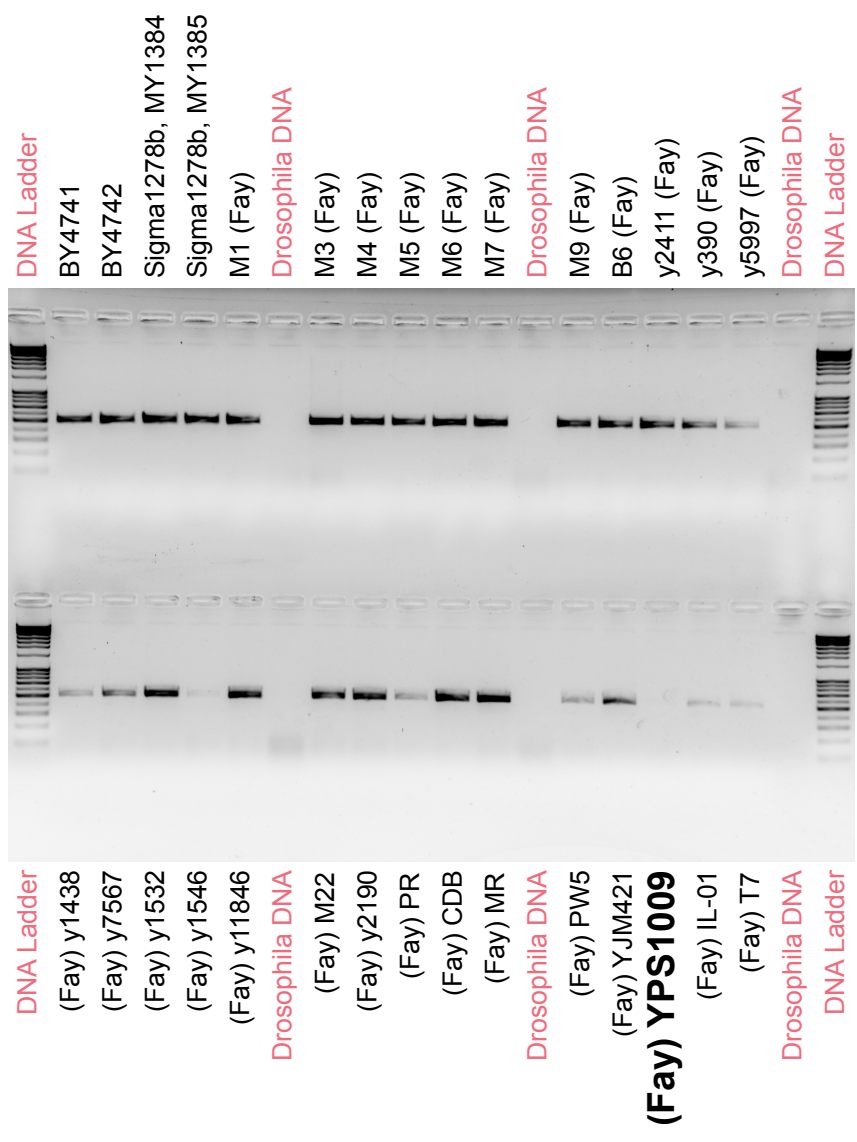

B

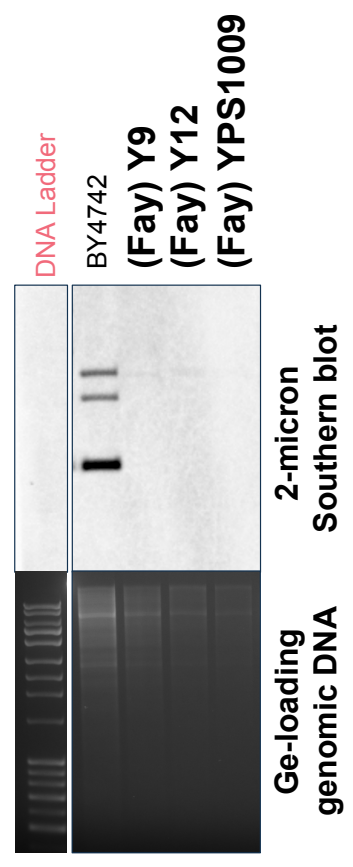

Supplement: supp [file elife-62337-supp-v1.zip]

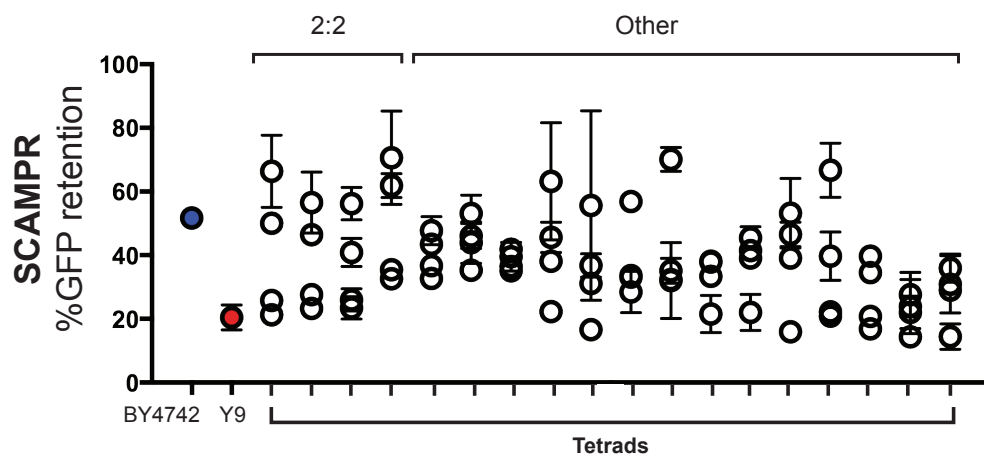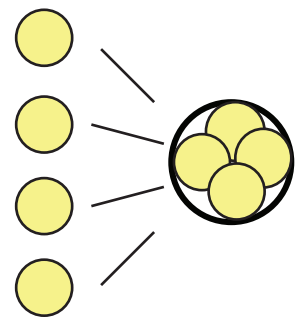

Supplement: supp [file elife-62337-supp-v1.zip]
